# Supplementary material for: Detecting SARS-CoV-2 in the Breath of COVID-19 Patients
Source: PubMed Central journal article supplement (PMC8010128; doi:10.3389/fmed.2021.604392), 2021-03-17
Supplement: Image_1.pdf [file Image_1.pdf]

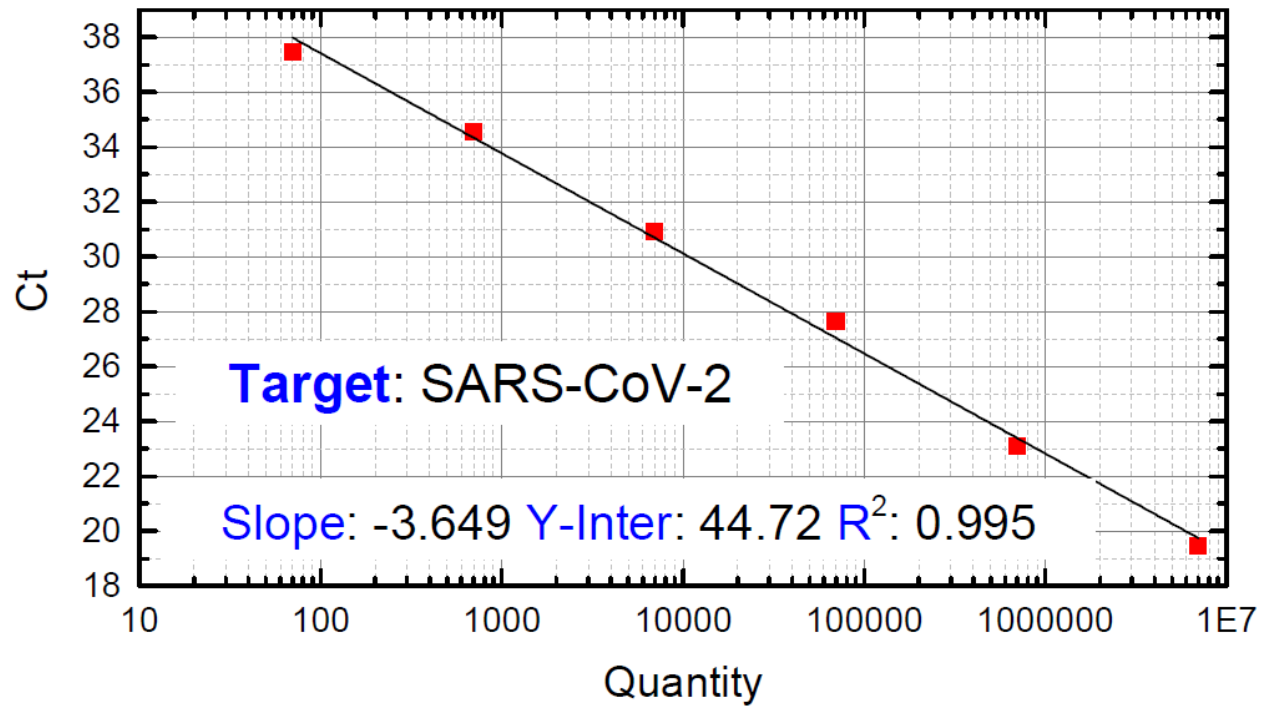

Supplementary Figure 1. Standard curve of the RT-PCR test for three positive SARS-CoV-2 cases.
